RESEARCH ARTICLE

# Loading of the hip and knee joints during whole body vibration training

Georg Bergmann<sup>1</sup>, Ines Kutzner<sup>1</sup>, Alwina Bender<sup>1</sup>, Jörn Dymke<sup>1</sup>, Adam Trepczynski<sup>1</sup>, Georg N. Duda<sup>1</sup>, Dieter Felsenberg<sup>2</sup>, Philipp Damm<sup>1\*</sup>

**1** Julius Wolff Institute, Charité – Universitätsmedizin Berlin, Berlin, Germany, **2** Center for Muscle and Bone Research, Charité – Universitätsmedizin Berlin, Berlin, Germany

\* [philipp.damm@charite.de](mailto:philipp.damm@charite.de)

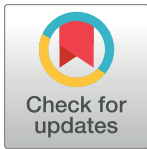

## Abstract

During whole body vibrations, the total contact force in knee and hip joints consists of a static component plus the vibration-induced dynamic component. In two different cohorts, these forces were measured with instrumented joint implants at different vibration frequencies and amplitudes. For three standing positions on two platforms, the dynamic forces were compared to the static forces, and the total forces were related to the peak forces during walking. A biomechanical model served for estimating muscle force increases from contact force increases. The median static forces were 122% to 168% (knee), resp. 93% to 141% (hip), of the body weight. The same accelerations produced higher dynamic forces for alternating than for parallel foot movements. The dynamic forces individually differed much between 5.3% to 27.5% of the static forces in the same positions. On the Powerplate, they were even close to zero in some subjects. The total forces were always below 79% of the forces during walking. The dynamic forces did not rise proportionally to platform accelerations. During stance (Galileo, 25 Hz, 2 mm), the damping of dynamic forces was only 8% between foot and knee but 54% between knee and hip. The *estimated* rises in muscle forces due to the vibrations were in the same ranges as the contact force increases. These rises were much smaller than the vibration-induced EMG increases, reported for the same platform accelerations. These small muscle force increases, along with the observation that the peak contact and muscle forces during vibrations remained far below those during walking, indicate that dynamic muscle force *amplitudes* cannot be the reason for positive effects of whole body vibrations on muscles, bone remodelling or arthritic joints. Positive effects of vibrations must be caused by factors other than raised forces amplitudes.

## OPEN ACCESS

**Citation:** Bergmann G, Kutzner I, Bender A, Dymke J, Trepczynski A, Duda GN, et al. (2018) Loading of the hip and knee joints during whole body vibration training. PLoS ONE 13(12): e0207014. <https://doi.org/10.1371/journal.pone.0207014>

**Editor:** Riccardo Di Giminiani, University of L'Aquila, ITALY

**Received:** May 16, 2018

**Accepted:** October 23, 2018

**Published:** December 12, 2018

**Copyright:** © 2018 Bergmann et al. This is an open access article distributed under the terms of the [Creative Commons Attribution License](https://creativecommons.org/licenses/by/4.0/), which permits unrestricted use, distribution, and reproduction in any medium, provided the original author and source are credited.

**Data Availability Statement:** The data evaluated for this study are available from [www.OrthoLoad.com](http://www.OrthoLoad.com) (key words: Implant = "Hip Joint III" or "Knee Joint", Activity = "Sports" plus "Vibration Training").

**Funding:** The Julius Wolff Institute obtained funding for this research from A) Bundesministerium für Bildung und Forschung ([www.bmbf.de/en](http://www.bmbf.de/en)). Funding for collecting and evaluating the data of this study (project 01EC1408A, Overload-PrevOP, SP03). B) Deutsche Forschungsgemeinschaft ([www.dfg.de/en](http://www.dfg.de/en)). Funding for performing two clinical studies (project

## Introduction

**Whole body vibration (WBV)** training induces vibrations with low strokes (total movement) and high frequencies at both feet during stance. One aim of WBV can be to exercise the muscles with less effort than required for conventional training. Many, but not all, studies report positive training effects (Supplement 1). However, it is unclear whether positive results are caused by high, vibration-induced muscle forces or by other mechanisms. With instrumented

Be 804/18-1 (hip) and project Be 804/19-1 (knee).  
 C) Deutsche Arthrose-Hilfe ([www.arthrose.de/](http://www.arthrose.de/)).  
 Funding for a temporary employment of GB by the Charité. D) OrthoLoad Club ([www.club.orthoload.com](http://www.club.orthoload.com)).  
 Funding for a temporary employment of PD by the Charité. All funders had no role in study design, data collection and analysis, decision to publish, or preparation of the manuscript.

**Competing interests:** The authors have declared that no competing interests exist.

joint implants, the **joint contact forces (JCF)** during the vibrations were telemetrically measured and compared to those without vibrations in the same position and during normal walking. A simplified biomechanical model allowed us to estimate the vibration-induced *muscle* forces from the measured JCF to answer this open question.

### Possible effects of whole body vibrations

Different mechanisms have been described concerning how muscles may be affected by WBV. A detailed overview can be found in [1]. The change in a muscle’s length, caused by vibrations, can cause a stretch reflex, which activates the muscle spindles [2, 3]. However, it was also shown that vibrations do not potentiate muscle spindle function as hypothesized [4]. It has further been suspected that muscles are activated, and thus trained, by shifting the resonance frequency of body parts away from the frequency of the external vibrations, such reducing oscillating strokes and discomfort [5, 6]. WBV may also inhibit antagonistic muscle activities [1], increase the blood flow in the lower legs [7], induce the switch from Type 1 to Type 2 muscle fibres [8] or increase the concentration of testosterone and growth hormones [9].

Another possible reason for an effective muscle training by WBV may be if the muscle forces *magnitudes* during the vibrations are very high. We hypothesize that they must then be higher than during everyday activities. For checking this possibility, we compare the measured joint contact forces during WBV to those during the frequent activity ‘walking’ (other everyday activities even cause higher forces [10, 11]). A new biomechanical model allowed to derive the muscle forces, required for this comparison, from the joint contact forces.

### Relations between accelerations and joint contact forces

During WBV training, a subject with the **body mass m** stands on a vibrating platform that applies vertical sinusoidal movements to both feet, either in the same or in opposite directions. Typical **peak-to-peak strokes (s)** and **frequencies (f)** are 1 to 5 mm and 10 to 50 Hz. The **peak acceleration at the foot (a<sub>foot</sub>)** is then:

$$a_{\text{foot}} = \left(\frac{s}{2}\right) * (2 * \pi * f)^2 \tag{Eq 1}$$

It may be a multiple of the gravitation acceleration g (e.g., a<sub>foot</sub> = 3.4 g at f = 25 Hz and s = 2.5 mm).

If the whole body (*mass m*) were absolutely rigid and fixed to the platform, the **hypothetical dynamic force between the foot and the platform (F’<sub>foot</sub>)** in the case of parallel vertical foot movements would be:

$$F'_{\text{foot}} = a_{\text{foot}} * \frac{m}{2} = s * m * \pi^2 * f^2 \tag{Eq 2}$$

This force would act additionally to the static force (g \* m/2) at each foot. In reality, the elasticity of bones, muscle-controlled joint flexions, damping by muscles and ‘wobbling masses’ of the upper body [12] have a frequency-dependent damping effect, which reduces the theoretical value of F’<sub>foot</sub> to the **real dynamic force at the foot (F<sub>foot</sub>)**. On the way from the foot to the knee and hip joints, the local acceleration is further reduced in dependency from, among other factors, body position and f. The acceleration was reported to be 40% of a<sub>foot</sub> at the knee and 10% at the hip joint [13], or even less [14]. Due to these reduced accelerations, the contact forces in the knee and hip joints must be expected to be lower than F’<sub>foot</sub>.

The only two in vivo measurements on the influence of vibrations on forces in the skeleton were performed with instrumented implants in the lumbar spine. On a vibrating chair

( $f = 0.3\text{--}30$  Hz,  $a = 0.1$  g) the forces increased by 17–84% [15]. When standing on a vibrating platform ( $s = 1$  and 2 mm,  $f = 12.5$  and 25 Hz) at different body positions, the highest increase was 38% [16]. Whether higher strokes increased or decreased the force depended on the body position.

### Literature survey

A survey of the numerous publications about WBV training is given in *Supplement 1*. The search included reports of positive, negative or non-existent effects of WBV for the lower extremities in the following application areas: muscles and movements, EMG activities, bone remodelling, joint implants and osteoarthritis. For all areas this survey delivered controversial results. The effect of WBV on training the strength of the lower extremity muscles was, for example, confirmed by three meta-studies (MS), denied by four MS and found to be controversial by another two MS.

The controversial reports on all possible applications of WBV may be due to differences between investigated subjects and applied vibration parameters ( $f$ ,  $s$ , platform type). It may also be that other parameters (e.g., number of motor neurons, neuronal-muscle-interfaces, muscle energy supply, glycogen resources, numbers of mitochondria in muscle cells, activity of satellite cells, etc.) and mechanisms were not identified yet. In none of the studies were proportional increases of EMG signals and muscle forces or JCF explicitly stated. The relation between both would have to be known to judge the possible training effects from captured EMG data.

Of special interest for our own study was this report [17]: In elderly subjects, a linear relationship between the acceleration  $a_{\text{foot}}$  and the summed EMG signals from six muscles in the lower leg was found. During ‘relaxed standing’ with  $a_{\text{foot}} = 50$  m/s<sup>2</sup>, the EMG signals were approximately 100% higher than without vibrations. Our own measurements were performed at the same acceleration and allow comparison between the *measured* increase in contact forces and the *reported* increase in EMG signals.

### In vivo measurements of knee and hip contact forces

In *hip* joints, telemetric JCF measurements with instrumented implants were first published in [18, 19]. Our own group reported such measurements in 17 subjects since 1993 [10, 20–26]. For *knee* joints, resultant forces at the tibial tray [27] and spatial forces and moments from up to three patients were published by others [28]. Our own group made data from nine subjects public [11, 29–39]. Measured JCF and synchronous patient videos during many different activities can be accessed in the public database OrthoLoad.com [40].

### Goals of this study

The JCFs in knee and hip joints were measured in vivo during WBV training with the goals of

1. collecting basic data on the induced dynamic joint contact forces,
2. estimating the muscle forces from the contact forces to answer the question of whether the dynamic muscle forces are high enough to generate training effects.

### Material and methods

In vivo measurements of JCF during WBV were performed in two different cohorts of patients with instrumented knee and hip implants. The measurement setups and evaluation methods were identical.

### Instrumented implants

An Innex total *knee* implant (Zimmer GmbH, Winterthur) was instrumented with an inductive power supply, load sensors and telemetric data transfer [41] to measure the three force and three moment components of the contact load that acts on the tibial tray [42] at asynchronous frequencies of approximately 100 Hz. The **resultant force** (*F*) was calculated from its three components. Because the moments only contain information about friction in the joints, they are not reported here. The deviation of the peak forces from the tibial axis is small during stance/squat (6°/7°) [11]. Therefore, the force component acting in the axis direction is nearly identical to the resultant force *F*.

A CTW total *hip* implant (Merete Medical, Berlin) was instrumented with the same electronics [41] to measure the six load components acting at the implant head [25]. *F* deviated from the long axis of the femur by 16°/24° during stance/squat [10]. Therefore, the force component in the direction of the femur axis is typically only 4%/9% smaller than the resultant force *F*, reported here.

### Investigated subjects

Measurements were taken in knee and hip patients from two studies which were approved by the Charité Ethics Committee (knee: EA4/069/06, hip: EA2/057/09) and registered at the German Clinical Trials Register (knee: DRKS00000606, hip: DRKS00000563). All patients gave written informed consent prior to participating in these studies and having their images published.

Six knee patients with primary gonarthrosis (Table 1) and four hip patients with primary coxarthrosis (transgluteal approach) were included in this study. On average, measurements were taken 39 (knee) and 14 (hip) months after joint replacement. All subjects exercised on the vibration platforms without restrictions or pain.

### Measurements

Measurements were taken at different frequencies *f*, strokes *s* and body positions (Table 2).

**Vibrating platforms.** Three platform types were used:

**Galileo 2000 (Galileo):** This platform (Novotec Medical and Stratec Medizintechnik, Germany) induced opposite vertical foot movements. The vibration frequency and the stroke (total platform movement) were exactly determined by the platform construction.

**Table 1. Subject data.** The measurements at the knee and hip were taken in two different cohorts. Postop. Time = Time of measurements.

| Knee Joint             |      |      |      |      |      |       |      |
|------------------------|------|------|------|------|------|-------|------|
| Subject [abbreviation] | K1   | K3   | K5   | K7   | K8   | K9    | Mean |
| Sex [male/female]      | m    | m    | m    | f    | m    | m     |      |
| Age [years]            | 66   | 74   | 63   | 77   | 73   | 77    | 71.7 |
| Body Weight [kg]       | 98.5 | 98.0 | 92.2 | 67.9 | 77.0 | 110.0 | 90.6 |
| Postop. Time [months]  | 46   | 45   | 39   | 37   | 33   | 31    | 38.5 |
| Hip Joint              |      |      |      |      |      |       |      |
| Subject [Abbreviation] | H2   | H3   | H4   | H5   |      |       | Mean |
| Sex [male/female]      | m    | m    | m    | f    |      |       |      |
| Age [years]            | 63   | 61   | 51   | 63   |      |       | 59.5 |
| Body Weight [kg]       | 82.5 | 90.3 | 81.1 | 87.9 |      |       | 85.5 |
| Postop. Time [months]  | 18   | 15   | 12   | 10   |      |       | 13.8 |

<https://doi.org/10.1371/journal.pone.0207014.t001>

**Table 2. Measurement conditions.** The vibration strokes  $s = 2$  to 4 mm are peak-to-peak values. The force  $F_{\text{foot}}$  between platform and foot was only measured on the GalileoS. Walking at 4 km/h and stance without vibrations in the three positions were additionally investigated.

| Body Position and Activities | Knees 15° Flexed           | Knees 50° Flexed           | Forefoot Stance            |
|------------------------------|----------------------------|----------------------------|----------------------------|
| GalileoS                     | 25 Hz, 2.5 mm              | 25 Hz, 2.5 mm              | 25 Hz, 2.5 mm              |
|                              | $F_{\text{foot}}$ measured | $F_{\text{foot}}$ measured | $F_{\text{foot}}$ measured |
| Galileo                      | 12.5 Hz, 2 + 4 mm          | —                          | —                          |
|                              | 25 Hz, 2 + 4 mm            | —                          | —                          |
| Powerplate                   | 25 Hz, 2 + 4 mm            | —                          | —                          |
|                              | 50 Hz, 2 + 4 mm            | —                          | —                          |

<https://doi.org/10.1371/journal.pone.0207014.t002>

**Galileo 2000 Sensor (GalileoS):** This platform was identical to Galileo, but additional transducers allowed for measurement of the forces  $F_{\text{foot}}$ , acting at the foot.

**Powerplate 5 (Powerplate):** This platform (Powerplate GmbH, Germany) induced parallel vertical foot movements. Due to its design, stroke and frequency slightly depended on the subject's body weight; they were not controlled.

**Body positions and activities.** Three different body positions were investigated, two of them only on the GalileoS (Table 2). The body positions (Fig 1) were controlled by an experienced physiotherapist. The vibration exercises lasted for 13 to 20 seconds.

**Knees 15° flexed:** Upright stance with 10° to 20° knee flexion and whole-foot support.

**Knees 50° flexed:** Upright stance with 45° to 55° knee flexion and whole-foot support.

**Forefoot stance:** Upright stance on the forefeet with straight knees.

Two activities were additionally investigated:

**Stance:** F was measured for 20 s without vibrations with the knees 15° flexed.

**Walking:** Three minutes walking at 4 km/h on a treadmill.

## Evaluation of data

Separately for the knee and hip cohorts, all forces were calculated for each subject in **percent of the body weight (%BW)** and then averaged (median and range) across the subjects. All dynamic force values refer to the amplitudes (zero to peak). The influence of parameter changes ( $f$ ,  $s$ , platform type, body position) on the dynamic contact forces was analysed statistically, using the Wilcoxon rank sum test. 'Significance' and 'low significance' were defined as  $p \leq 0.05$  and  $p \leq 0.10$ , respectively.

**Static and dynamic joint forces during vibrations.**  $F$  contained three components (Fig 2A, blue):

- i. the **offset force ( $F_{\text{off}}$ )**, which depended on the slightly varying body position and possibly also on antagonistic muscle activities,
- ii. the **vibration force ( $F_{\text{vib}}$ )** and
- iii. small noise due to the 4 kHz frequency of the power supply.

Time intervals were evaluated when  $F_{\text{vib}}$  was nearly stationary (red boxes), using a customized programme (Matlab R2011a). Fast Fourier transformations showed relevant amplitudes at  $f$  and below 3 Hz. Low pass filtering of  $F$  (*Butterworth order 10, cut-off frequency 4 Hz*) delivered  $F_{\text{off}}$  (Fig 2A, yellow). The **average static force ( $F_{\text{stat}}$ )** was then calculated as the arithmetic mean of  $F_{\text{off}}$  during the evaluated time (Fig 2D, dashed red).

Bandpass filtering of  $F$  (*Butterworth order 10, centre frequency  $f$ , bandwidth  $\pm 2.7$  Hz*) resulted in  $F_{\text{vib}}$  (Fig 2B). Because the asynchronous, force-dependent sampling frequency of

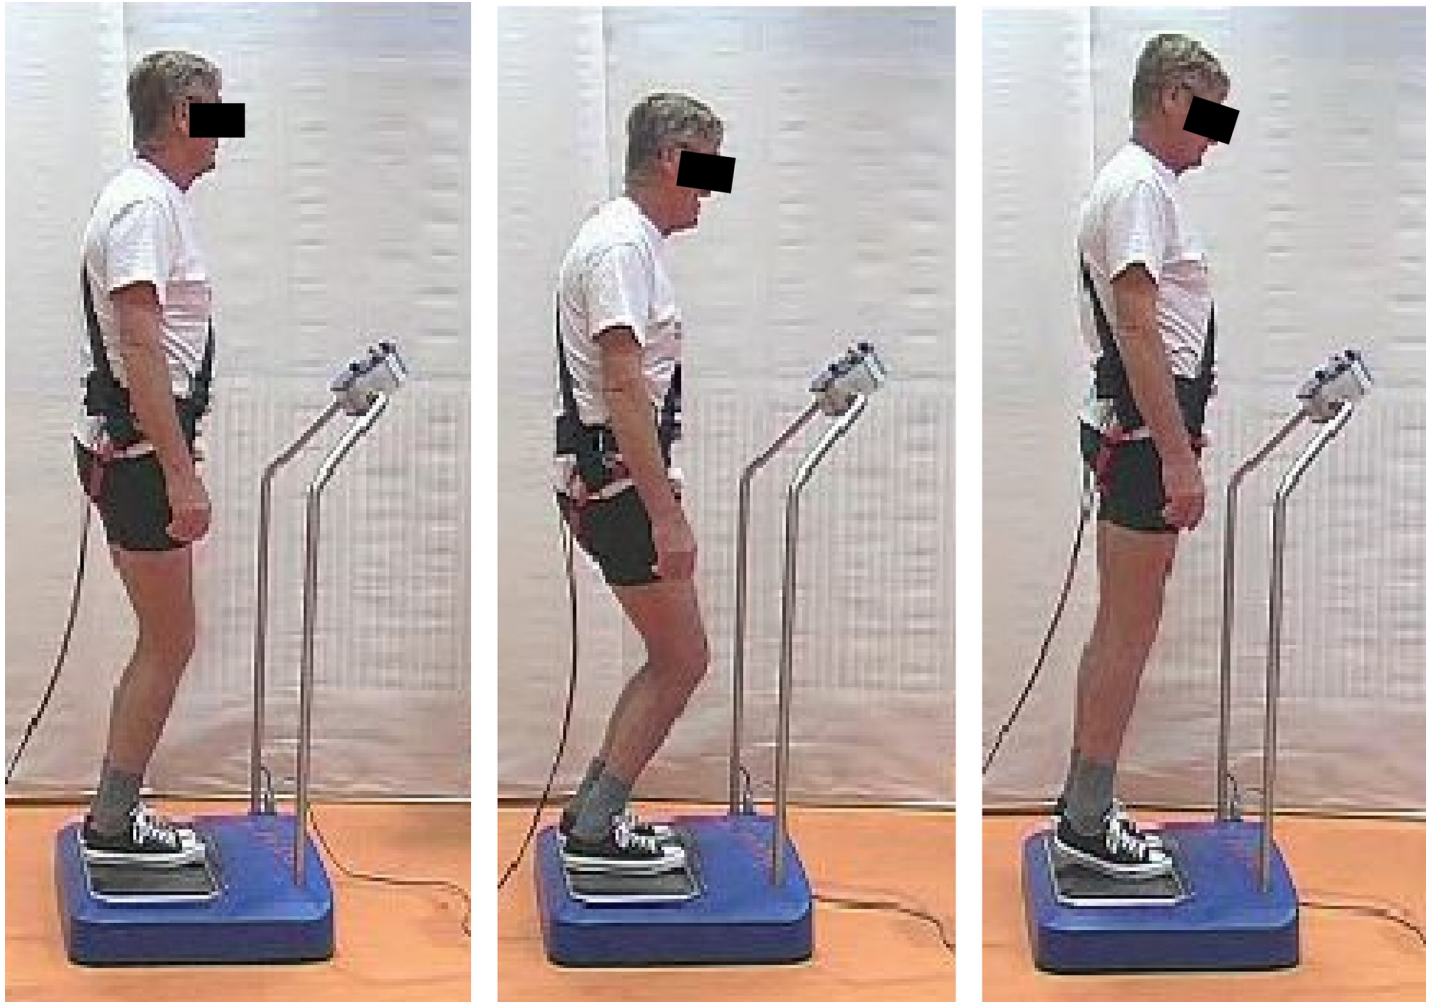

**Fig 1. Subject in three positions on Powerplate.** From left: Knees 15° flexed, knees 50° flexed, forefoot stance.

<https://doi.org/10.1371/journal.pone.0207014.g001>

approximately 100 Hz was in the order of magnitude of the vibration frequencies of 12.5 to 50 Hz, the dynamic force amplitude could not be obtained accurately during every vibration cycle. Therefore,  $F_{vib}$  was rectified (Fig 2C, blue) and its maxima were determined every second (example: blue circle). All maxima were averaged, which delivered the amplitude of the **average dynamic peak force** ( $F_{dyn}$ ) for a given subject (Fig 2C and 2D, green).

These procedures lead to the ‘**normalized**’ contact force ( $F_{norm}$ ) in the joint:

$$F_{norm} = F_{stat} + F_{dyn} * \sin(2\pi f * t) \quad (\text{Eq 3})$$

**Static forces without vibration.** For standing with 15° knee flexion,  $F_{stat}$  with vibrations was compared to the **maximum force without vibrations** ( $F_0$ ).

**Dynamic forces at the foot.** The *measured* dynamic force  $F_{foot}$  at the foot was compared to its *hypothetic* value  $F'_{foot}$  that would act if the whole body were rigid (Eq 2). Furthermore,  $F_{dyn}$  in the knee and hip were compared to  $F_{foot}$  to access the force attenuation from the foot over the knee to the hip.

**Peak forces during walking.**  $F$  during walking was evaluated by a customized programme (Visual Basic). The time patterns of  $F$  throughout 15 single steps after two minutes of walking

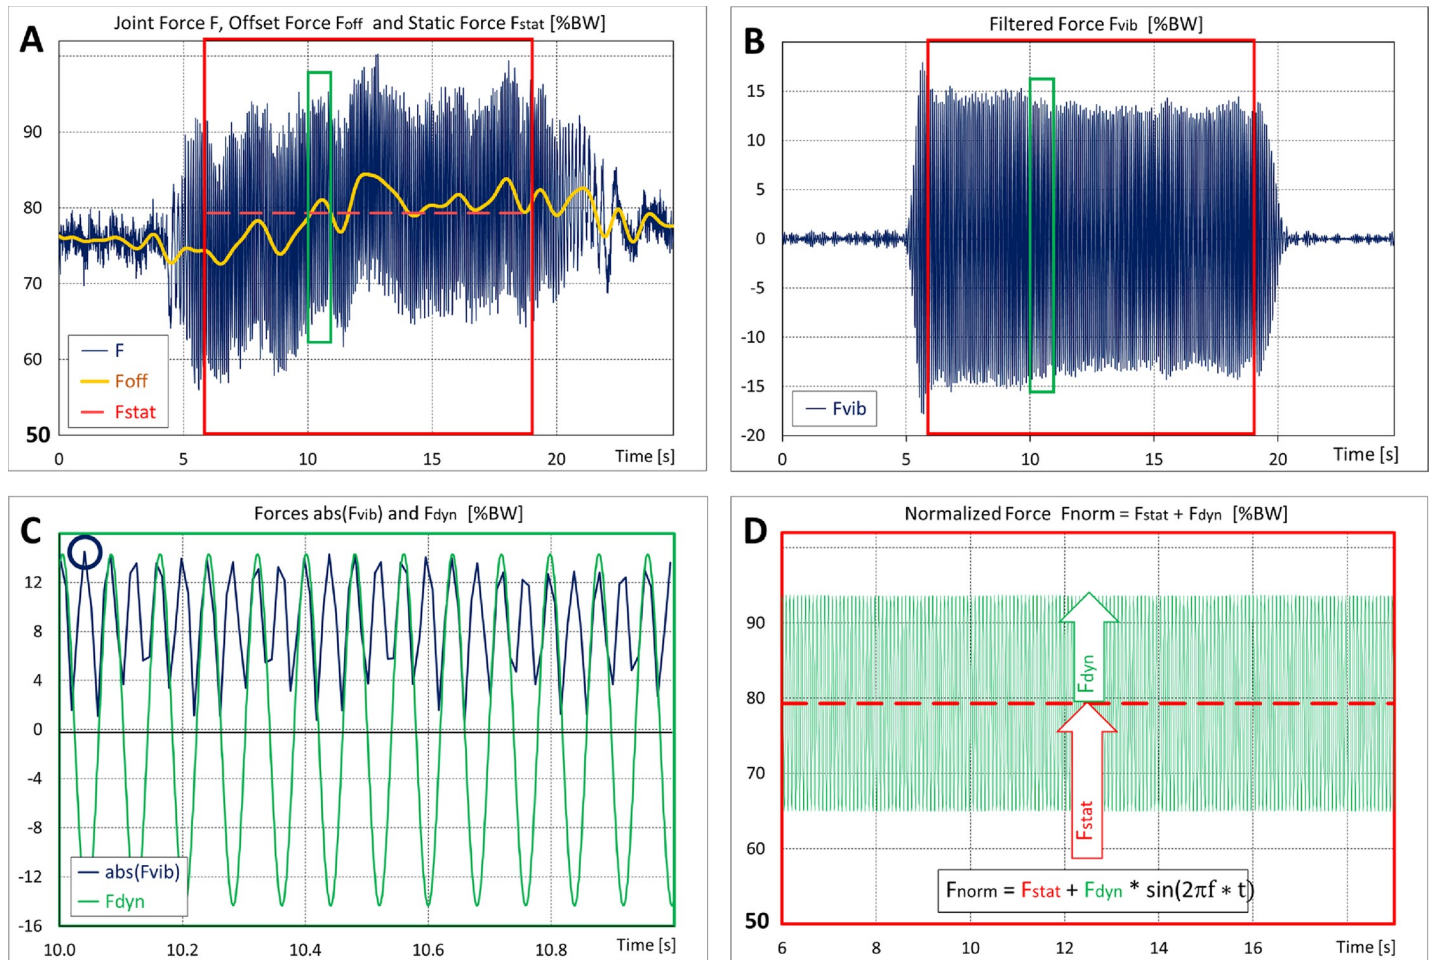

**Fig 2. Measured contact force and data evaluation.** Data from the preceding feasibility study. Galileo, knees 15° flexed, 12.5 Hz, 2.5mm. Vibrations between 4.5 s and 22 s. Evaluation range 6 s to 19 s (red frames). Note that the scales in A and D start at 50%BW. **A:** The joint force  $F$  consists of the offset force  $F_{off}$  (yellow), the vibration component  $F_{vib}$  around  $F_{off}$  (blue) and small noise.  $F_{off}$  is obtained by lowpass filtering of  $F$ .  $F_{stat}$  (red) see explanation for D. **B:** Bandpass filtering of  $F$  eliminates  $F_{off}$  plus noise and delivers  $F_{vib}$ . **C:** Detail from the green boxes in A, B.  $F_{vib}$  is rectified ( $abs(F_{vib})$ , blue). Every second, the maximum is determined (blue circle), and all maxima are averaged. This averaging delivers the amplitude  $F_{dyn}$  of the dynamic force (green). **D:** Averaging of  $F_{off}$  delivers the static preload  $F_{stat}$  (dashed red). Reported are the median values and inter-individual ranges of  $F_{stat}$  and  $F_{dyn}$  of the ‘normalized’ joint force  $F_{norm} = F_{stat} + F_{dyn} * \sin(2\pi f * t)$ .

<https://doi.org/10.1371/journal.pone.0207014.g002>

were averaged by a ‘dynamic time warping’ procedure which was designed as to best maintain the force maxima [43]. During the obtained average step,  $F$  always showed a ‘double-peak’ pattern within the stance phase [10, 11]. The largest of both peaks was taken as the **peak force** ( $F_{peak}$ ) during walking.

### Biomechanical model of the relation between contact and muscle forces

As described in the Introduction, our measured rise in contact forces during WBV can be compared to reported increases in EMG signals [17] under the same test conditions. The following biomechanical model of the knee allows to estimate the muscle forces from the measured contact forces. Using this model, the vibration-induced increase in muscle forces can be compared to the reported increase in EMG signals. This allows a decision on whether it is legitimate to conclude from rises in EMG signals during WBV on proportional increases in muscle forces.

The simplified static model (Fig 3A) is based on the force and moment equilibrium in the sagittal plane. All forces are two-dimensional vectors. In a standing position with 15° knee

flexion, the ground reaction force is only balanced by the quadriceps force. The *relative* lengths of all lever arms and the force directions were taken from the average of our knee cohort. The model describes how much contact and muscle force rise when the ground reaction force increases by 25% (simulating vibrations) while the body position remains unchanged. This model describes two cases: a) without antagonistic muscle activities (Fig 3B and 3C) and b) with a 25% increase in the quadriceps force due to antagonist activities (Fig 3D and 3E).

The following measures are used:

W Ground reaction force at foot. The lever arm of W depends on the a-p position at which the ground reaction force acts at the foot, i.e., on how much the body weight is shifted forwards or backwards.

Q Quadriceps force. The relation between W and Q depends on the relation of their lever arms. The lever arm of W was assumed to be three times larger than that of Q, resulting in  $Q = 3 \cdot W$ .

F Knee contact force

A1, A2 Additional, antagonistic muscle forces that counterbalance each other and may be exerted by the subjects for stabilizing the joint. A1 was *assumed* to always be 25% of Q, A2 depends on the relation of the lever arms of A1 and A2. With the relation of 1 to 0.8, A2 becomes 25% larger than A1.

The vector of the contact force F is calculated from

$$F = W + Q + A1 + A2$$

A1 and A2 are zero if antagonistic activities are lacking. This model can answer the question of what percent the muscle force  $|Q + A1|$  (length of vector  $Q + A1$ ) rises for a given percentage rise of the contact force  $|F|$ .

This biomechanical model is very much simplified, since it neglects dynamic effects like damping and tendon elasticities. It can certainly only deliver rough estimates of muscle force changes. The *absolute* force values may differ from the real situation, but the *relative* force changes are more realistic.

## Results

If not mentioned otherwise, all cited forces refer to their median values. ‘Knee’ and ‘hip’ refer to the respective joint. Reductions are stated with negative signs, e.g., ‘reduction by -5%’.

### Time courses of contact force

The contact force F not only depended on frequency, stroke and platform type but also differed substantially between the subjects (Fig 4). The offset force  $F_{\text{off}}$  was sometimes nearly constant (A), often slowly decreased or increased during the vibration time (B) and sometimes fluctuated strongly (C). The overlaid dynamic force  $F_{\text{vib}}$  had very deviating magnitudes in different individuals under the same f/s-conditions (smaller from A to C). In most cases, it stayed nearly constant (A, C), but in some subjects the dynamic amplitude became smaller with the vibration time (B).

### Dynamic forces at different frequencies, strokes and platforms

The dynamic forces  $F_{\text{dyn}}$  on the Galileo and Powerplate platforms at different f and s values are charted in Fig 5.



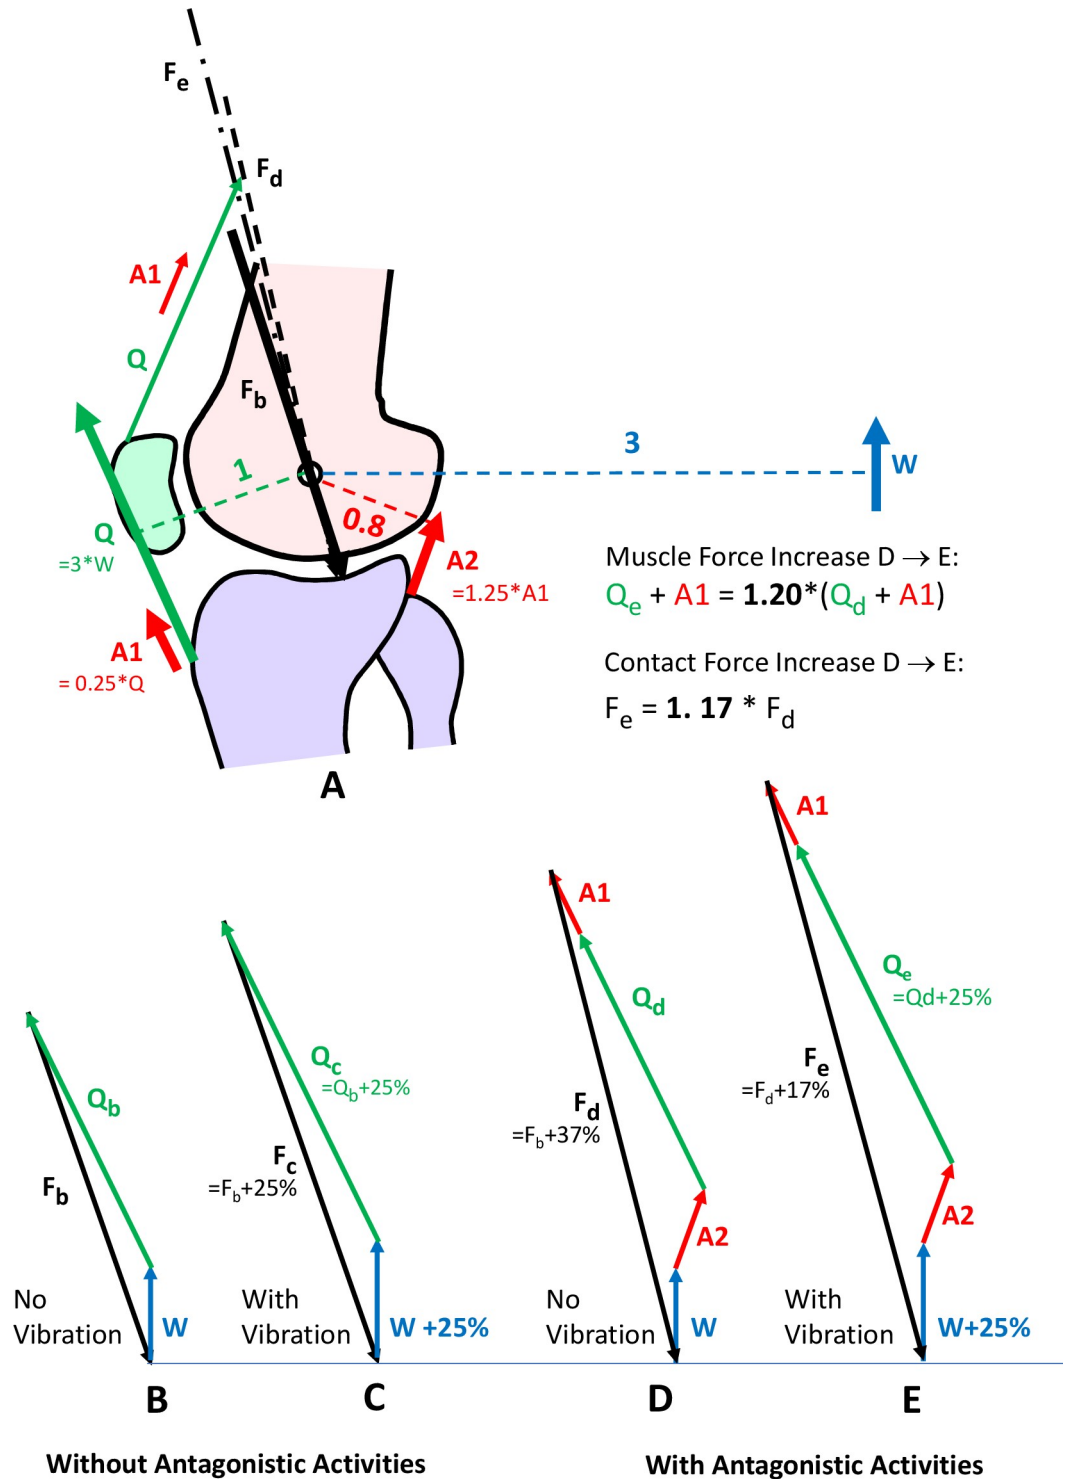

**Fig 3. Simplified static knee model in the sagittal plane.** (A)  $W$  = ground reaction force.  $Q$  = minimally required quadriceps force at tibia to balance  $W$ .  $F_b$  to  $F_c$  = joint contact forces.  $A1$  = additional antagonistic component of  $Q$ , always assumed to be 25% of  $Q$ .  $A2$  = antagonist of  $A1$ . (B) No antagonistic activities. (C) Like B, but  $W$  was increased by 25%, simulating vibrations. (D) With antagonistic forces  $A1$  and  $A2$ . (E) Like D, but  $W$  was increased by 25%.

<https://doi.org/10.1371/journal.pone.0207014.g003>

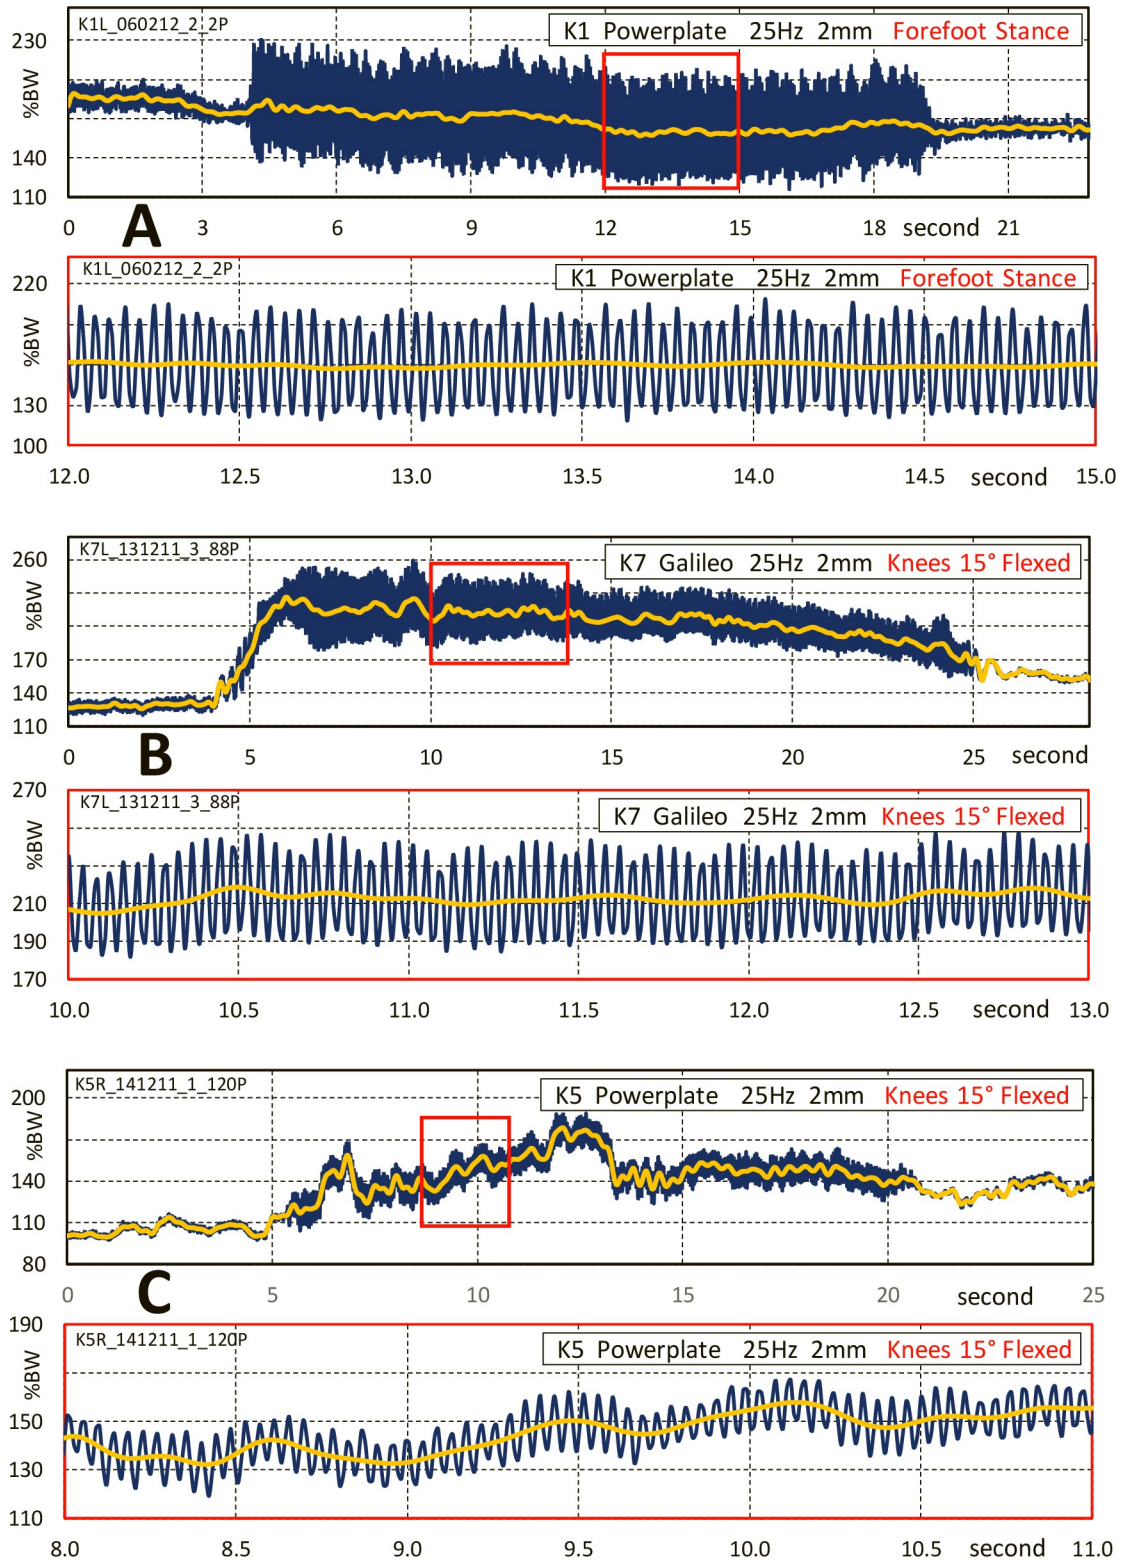

**Fig 4. Samples of knee contact forces.** A to C each contain an overview and a detail (red frames) of measurements on the Powerplate or Galileo at 25 Hz, 2 mm. Blue = contact force  $F$ . Yellow = offset force  $F_{off}$ . Vibration force  $F_{vib}$  = difference between blue extrema and yellow curves. Note that the scales differ and don't start at zero.

<https://doi.org/10.1371/journal.pone.0207014.g004>

The highest median values never exceeded 35.2%BW (knee) and 20.8%BW (hip). Especially in the knee, the ranges of  $F_{dyn}$  were large, i.e., the dynamic force varied extremely between the subjects. Under some  $f/s$ -conditions the highest values were more than 100% larger than the median values, e.g., in the knee by +143% (Galileo, 25 Hz, 2 mm). On the Powerplate the upper and lower limits of  $F_{dyn}$  deviated by a factor of up to 11 (knee, 50 Hz, 4 mm). The lowest values indicate that some subjects exercised with  $F_{dyn}$  close to zero. Some subjects showed values of  $F_{dyn}$  that were close to the upper range under one  $f/s$ /platform condition but values close to the lower range under a different condition.

Under only one condition (Galileo, 12.5 Hz, 2 mm) was  $F_{dyn}$  in the knee close to that in the hip. Otherwise,  $F_{dyn}$  was always much larger in the knee. On the Galileo, this surplus was +54% to +110%; on the Powerplate, it was 101% to 283%. At 25 Hz, the median of  $F_{dyn}$  was always higher on the Galileo than that on the Powerplate. For strokes of 2 and 4 mm, this excess was +143% to +73% (knee) and +102% to +106% (hip).

However, due to the strong individual differences in  $F_{dyn}$  under all exercise conditions, reflected by the large ranges in Fig 5, only a few parameter changes caused statistically significant changes in  $F_{dyn}$ . Significant changes (\*\*,  $p \leq 0.05$ ) were only encountered in the knee and hip when the platform changed from Galileo to Powerplate (at 25 Hz, 4 mm).

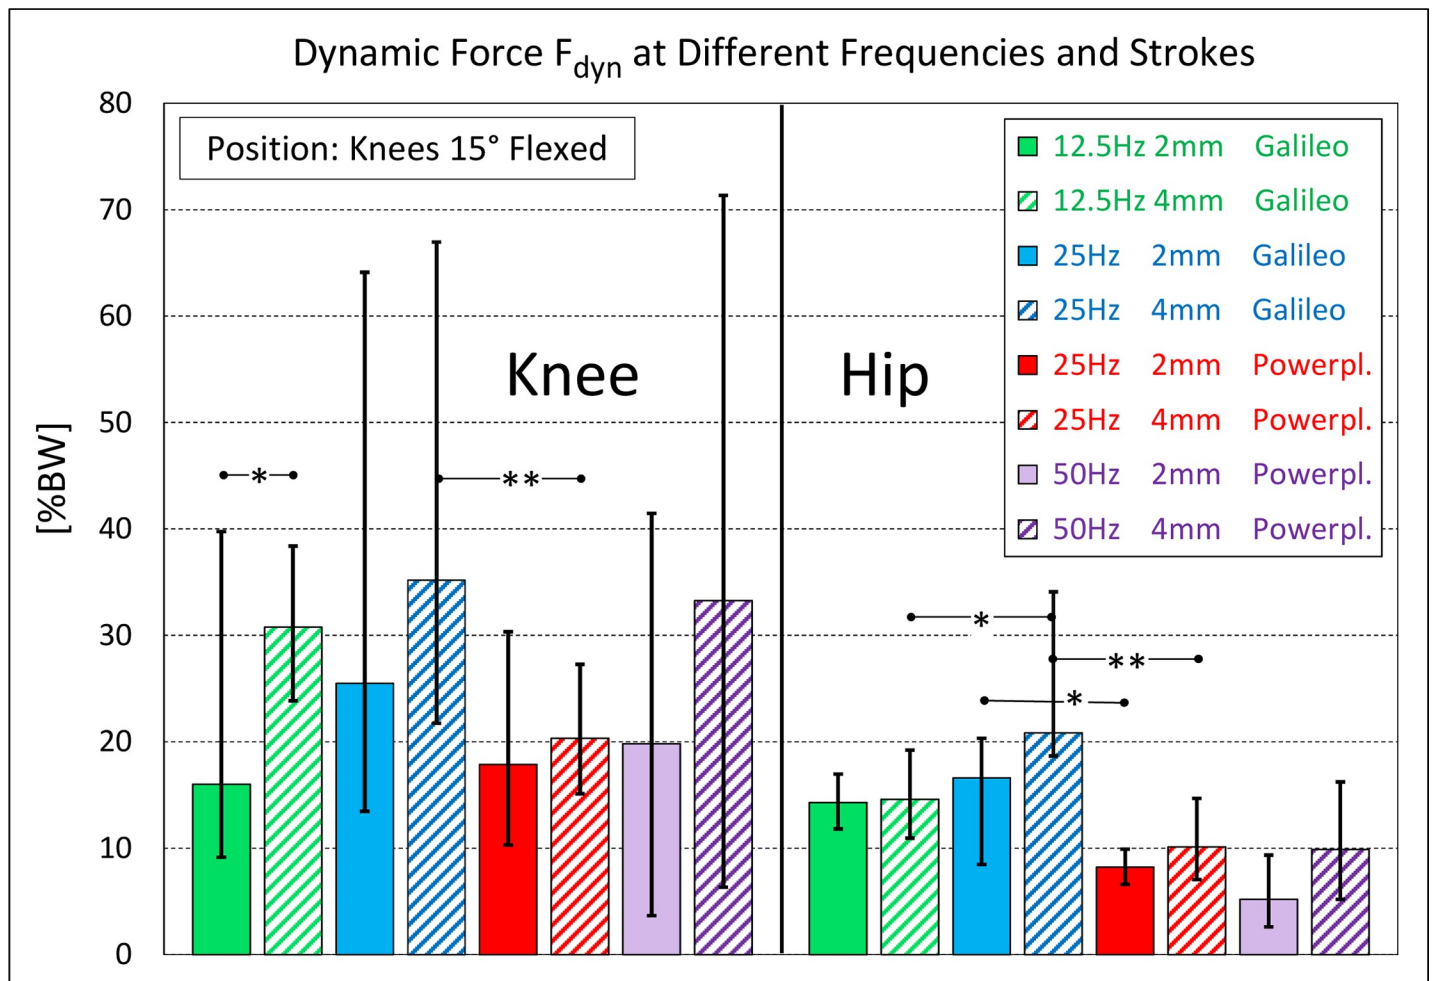

Fig 5. Dynamic force  $F_{dyn}$  in knee and hip joint at different frequencies and strokes. Median values and ranges on Galileo and Powerplate. Body position = knees 15° flexed. \*\* = significant change ( $p \leq 0.05$ ), \* = low significance ( $p \leq 0.10$ ).

<https://doi.org/10.1371/journal.pone.0207014.g005>

### Dynamic forces at different foot accelerations

For the data in Fig 5, the platform accelerations  $a_{foot}$  (Eq 1) were 6.2 to 49.4  $m/s^2$  for the Galileo and 24.7 to 197.4  $m/s^2$  for the Powerplate. When charting  $F_{dyn}$  against  $a_{foot}$ , very different coefficients of determination were found for the regression lines (Fig 6).

In one case  $R^2$  was nearly zero. For the Galileo, the  $R^2$  values were 0.57/0.99 (knee/hip) and for the Powerplate, they were 0.89/ 0.02.  $F_{dyn}$  and  $a_{foot}$  did not change proportionally, as none of the regression lines crossed the zero point. These regression lines would therefore predict existing dynamic forces without vibrations. Logarithmic regression functions resulted in lower  $R^2$  values and also predicted positive  $F_{dyn}$  values at  $a_{foot} = 0$ . The non-proportional relation between  $F_{dyn}$  and  $a_{foot}$  indicates that  $F_{dyn}$  is damped much more at higher platform accelerations than at lower ones.

### Dynamic joint forces at different body positions and comparison to dynamic forces at the foot

Fig 7 shows the dynamic forces  $F_{foot}$  at the foot (red columns) and the dynamic forces  $F_{dyn}$  in the knee/hip (green/blue columns) for three body positions on the GalileoS at 25 Hz and 2.5 mm.  $F_{foot}$  differs between the knee and hip because different cohorts were investigated.

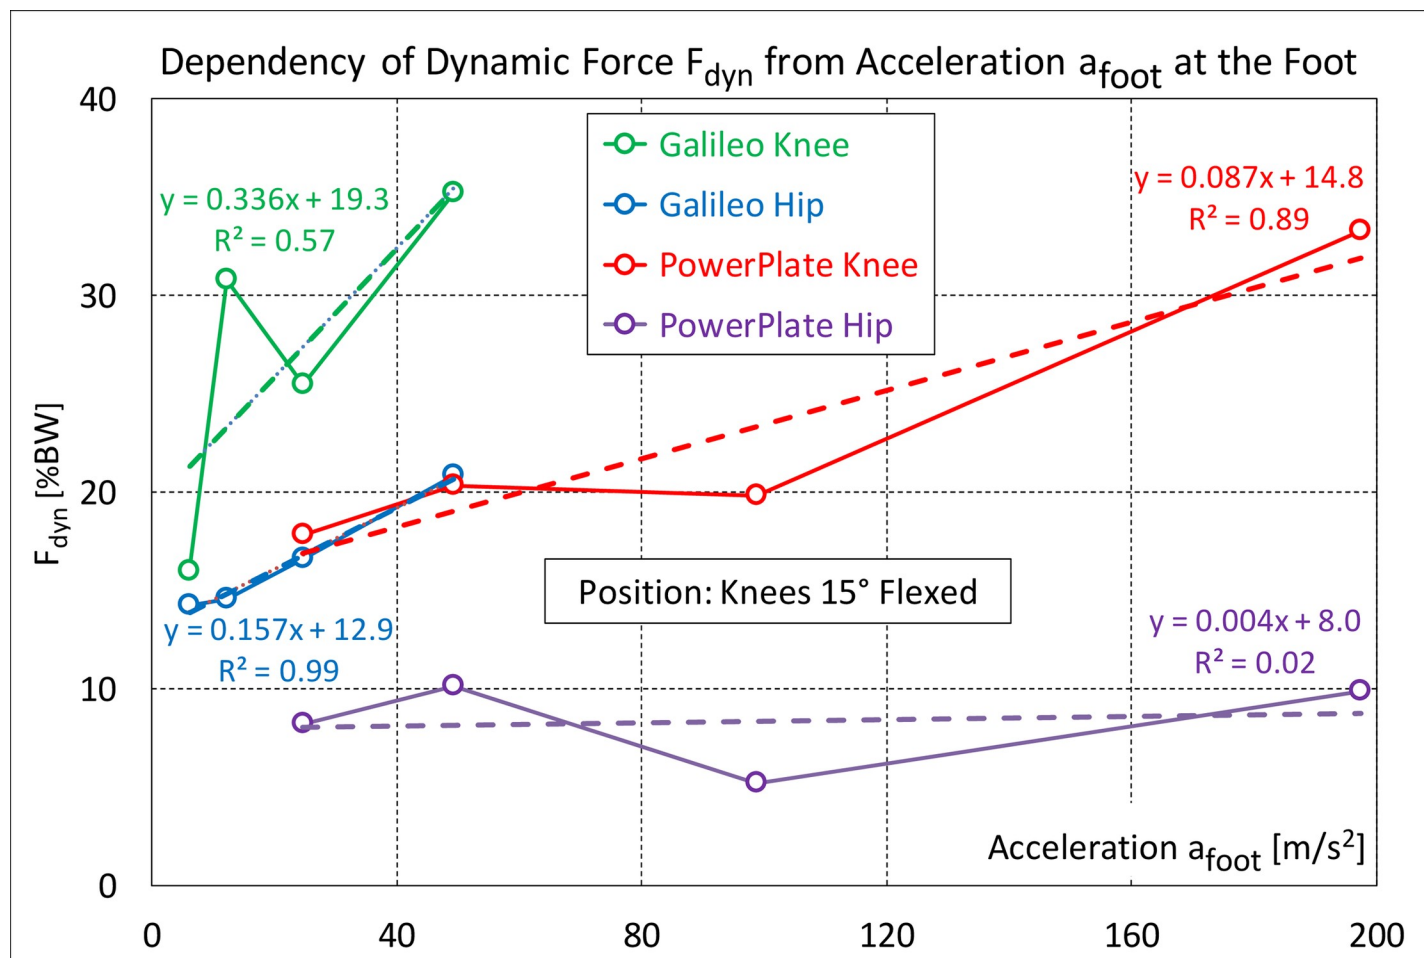

**Fig 6. Relation between dynamic force and peak acceleration at the foot.** Only for the Galileo data from the hip and the Powerplate data from the knee was a good linear correlation found between the dynamic force  $F_{dyn}$  and the acceleration  $a_{foot}$  at the foot. Because none of the correlation lines cross the zero point,  $F_{dyn}$  doesn't change proportionally to  $a_{foot}$ .

<https://doi.org/10.1371/journal.pone.0207014.g006>

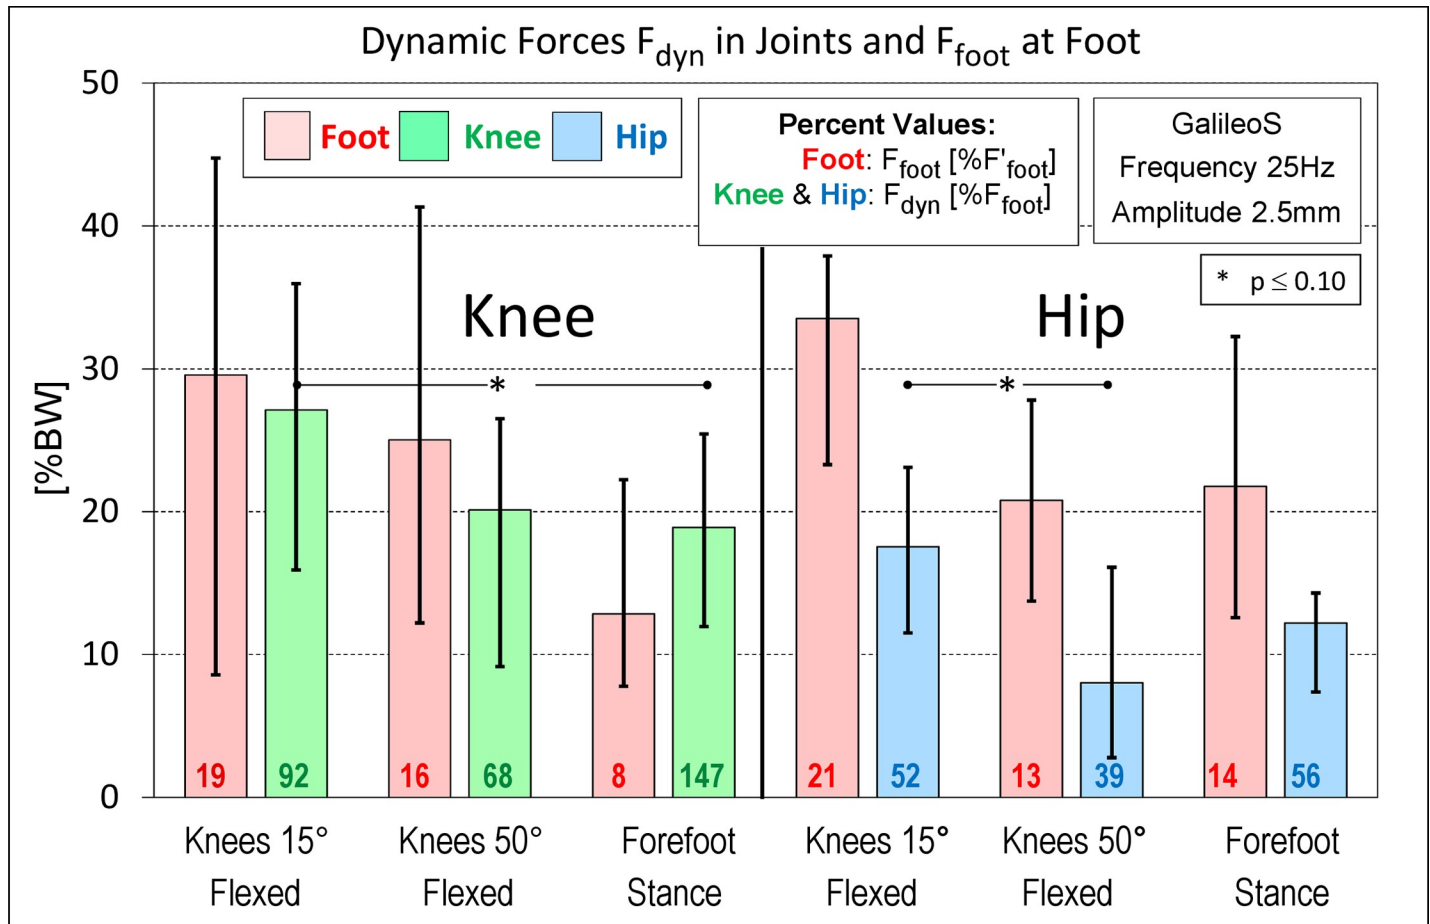

**Fig 7. Dynamic force in the knee and hip joint in different body positions and comparisons to the dynamic force at the foot.** Median values and ranges from the knee and hip joint for three different body positions. All data from GalileoS at 25 Hz, 2.5 mm. Red columns = measured force  $F_{foot}$  at foot. Green/blue columns = dynamic force  $F_{dyn}$  in the knee/hip joint. Percentage values at the bottom of columns: Red = measured force  $F_{foot}$  as a percent of the hypothetical force  $F'_{foot}$  at the foot. Green/blue =  $F_{dyn}$  as a percent of  $F_{foot}$ . \*\* = significant change ( $p \leq 0.05$ ), \* = low significance ( $p \leq 0.10$ ).

<https://doi.org/10.1371/journal.pone.0207014.g007>

For the same position,  $F_{dyn}$  was always much higher in the knee than that in the hip (+54% to +151%). With values of 27.0/17.6%BW (knee/hip),  $F_{dyn}$  was highest if the knees were flexed by only 15°. The influence of the body position on  $F_{dyn}$  was different between the knee and hip: Increasing the knee flexion to 50° reduced  $F_{dyn}$  by -26% in the knee but much more in the hip (-55%). Changing from 50° flexion to a forefoot stance slightly further decreased  $F_{dyn}$  in the knee but let it rise by +53% in the hip. As already observed for the changed parameters  $f/s$ /platform (Fig 5), the effects of changed body position on  $F_{dyn}$  were only rarely found to be significant, namely, for the knee when changing from 15° flexion to a forefoot stance and for the hip when increasing flexion from 15° to 50°.

With one exception (knee during forefoot stance),  $F_{dyn}$  in both the knee and hip were smaller than  $F_{foot}$  (green/blue percentage values). The reductions from  $F_{foot}$  to  $F_{dyn}$  were -8%/ -32% in the knee for 15°/50° knee flexion, but they were more pronounced (-48%/ -61%) in the hip. Unexpectedly,  $F_{dyn}$  in the knee exceeded  $F_{foot}$  by +47% when the subjects stood on the forefeet.

The forces  $F_{foot}$  also depended on the body position (Fig 7). For both joints,  $F_{foot}$  was highest if the knees were flexed by 15°. Increasing the flexion to 50° reduced  $F_{foot}$  by -16%/ -38%

(knee/hip). Further changing to a forefoot stance slightly reduced  $F_{\text{foot}}$  in the knee, but increased it in the hip.

$F_{\text{foot}}$  was always much smaller (red percent values) than the force  $F'_{\text{foot}}$  (Eq 2) that would (hypothetically) act at the foot if the whole body were rigid and without any elastic or damping properties. Only 8% to 21% of  $F'_{\text{foot}}$  truly acted at the foot, with highest percentages acting if the knee was flexed by only  $15^\circ$ .

### Static and dynamic forces during vibrations, compared to peak forces during walking

Fig 8 shows the preload  $F_{\text{stat}}$  in the knee/hip (green/blue columns) and the dynamic force  $F_{\text{dyn}}$  (yellow top boxes, values as in Fig 5) at different frequencies  $f$  (Hz) and strokes  $s$  (mm) on the Galileo and the Powerplate. The subjects always stood with  $15^\circ$  knee flexion.  $F_0$  are the static forces in the same position, but without vibrations. Added are the peak forces  $F_{\text{peak}}$  during walking (orange columns). For each  $f/s$ -condition, the excess of  $F_{\text{stat}}$  above  $F_0$  and the relation  $F_{\text{dyn}}/F_{\text{stat}}$  are indicated as a percentage.

**Static forces  $F_{\text{stat}}$ .** On the *Galileo*,  $F_{\text{stat}}$  with vibrations was higher than  $F_0$  without vibrations under three of four  $f/s$ -conditions (black percent numbers). These increases were +8% to +17% (knee) and +9% to +37% (hip). Under one condition each, different for the knee and hip, the static force was not influenced by the vibrations.  $F_{\text{stat}}$  was always smaller than 67%/52% (knee/hip) of the peak force  $F_{\text{peak}}$  during walking.

On the *Powerplate*,  $F_{\text{stat}}$  with vibrations mostly lay below  $F_0$  without vibrations (black percent numbers). It decreased by -7% to -16% (knee) and by -4% to -10% (hip). Under one condition, a small increase of +7% was observed in the hip.  $F_{\text{stat}}$  never exceeded 53%/40% (knee/hip) of  $F_{\text{peak}}$  during walking.

**Relations between dynamic and static forces.** On the *Galileo*, the dynamic force  $F_{\text{dyn}}$  never exceeded 22.6% of the static preload  $F_{\text{stat}}$  (green percentages).  $F_{\text{dyn}}$  was 9.8% to 22.6% (knee) and 10.3% to 16.4% (hip) of  $F_{\text{stat}}$ . The force maximum  $F_{\text{stat}} + F_{\text{dyn}}$  with vibrations remained below 79%/56% (knee/hip) of  $F_{\text{peak}}$  during walking.

On the *Powerplate*, the vibration-induced *relative* force increases in the knee were similar to those produced on the Galileo, but in the hip these increases were much smaller.  $F_{\text{dyn}}$  values were 14.7% to 27.5% (knee) and 5.3% to 10.0% (hip) of  $F_{\text{stat}}$ . The force maxima  $F_{\text{stat}} + F_{\text{dyn}}$  never exceeded 61%/44% (knee/hip) of  $F_{\text{peak}}$  during walking.

### Relation between increases in contact and muscle forces

The biomechanical knee model shows (Fig 3B and 3C) that the magnitude of the muscle force  $Q + A1$  rises due to WBV by the same percentage as the contact force  $F$  if antagonistic muscle activities are lacking. Both increases are then proportional to the relative, vibration-induced increase in the ground reaction force  $W$ . If antagonistic activities exist in the assumed extent (Fig 3D and 3E), the muscle force  $Q + A1$  increases only slightly more (+20%) than the contact forces  $F$  (+17%). The difference between both increases remains small if the lever arms of  $W$ ,  $A1$  and  $A2$  are modified within realistic ranges, if the magnitudes of the antagonistic forces  $A1$  and  $A2$  are changed or if the ground reaction force  $W$  increases by more than 25%.

## Discussion

### Individual differences of dynamic force

As the large ranges in Figs 5 and 7 indicate, the dynamic force  $F_{\text{dyn}}$  differed substantially between the subjects. These large variations under the same conditions had the consequence

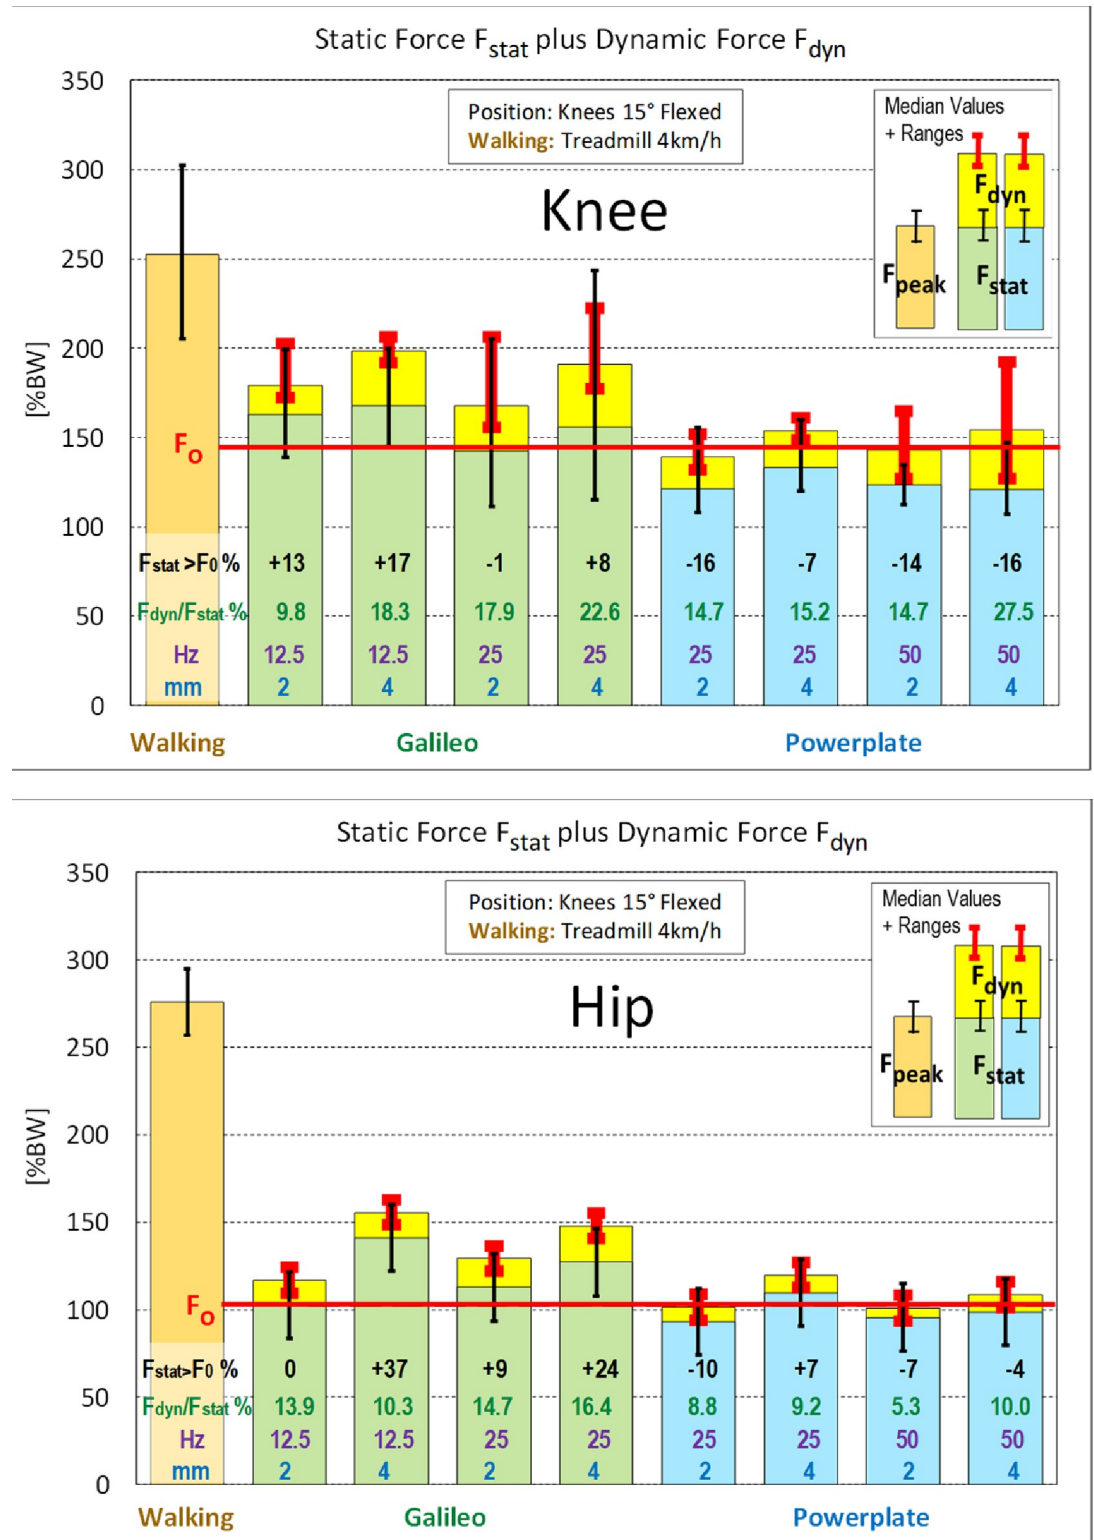

**Fig 8. Static plus dynamic joint forces on Galileo and Powerplate platforms, compared to peak forces during walking.** Body position: knees 15° flexed. Orange columns = peak force  $F_{peak}$  during walking. Green/blue columns = median plus (black) range of static force  $F_{stat}$  (with vibrations). Top yellow boxes = median plus (red) range of dynamic force  $F_{dyn}$  (values as in Fig 5). ' $F_0$ ' = static force in same position without vibration. ' $F_{stat} > F_0$  %' = Excess of  $F_{stat}$  above  $F_0$  as a percent of  $F_0$ . ' $F_{dyn}/F_{stat}$  %' = dynamic force  $F_{dyn}$  as a percent of static force  $F_{stat}$ . 'Hz' = platform frequency. 'mm' = platform stroke.

<https://doi.org/10.1371/journal.pone.0207014.g008>

that the changes in  $F_{\text{dyn}}$ , caused by modifications of  $f$ ,  $s$ , platform type or body position, were mostly non-significant. Therefore, the presented dynamic forces can only show trends. Different absolute values of  $F_{\text{dyn}}$  must be expected if other cohorts are investigated.

As the literature review (S1 File) revealed, very controversial results of WBV training were reported for all applications to the lower limbs. Positive, negative and absent influences on muscles, movements, EMG activities, bone remodelling, joint implants and osteoarthritis were published. The extreme dependency of the dynamic forces on the investigated subjects and vibration conditions, reported here, can probably explain many of these discrepancies.

### Other observations

$F_{\text{dyn}}$  sometimes changed throughout the vibration time (example in Fig 4B). We speculate that these changes are caused by modifying the damping to reduce the discomfort of the exercise, especially in the knee joint. Unfortunately, we could not systematically investigate the underlying mechanical and physiological mechanisms because the elderly subjects were unwilling to extend the measurements further. Therefore, our data just describe the effects of WBV 'as they are in practice' and the underlying mechanisms still remain to be detected.

When standing on the forefeet on the GalileoS, the dynamic force  $F_{\text{dyn}}$  in the knee was 47% higher than the dynamic force  $F_{\text{foot}}$  at the foot. An explanation for this effect could not be found; possibly, resonance phenomena may explain this observation.

### Can contact forces in implants be transferred to natural joints?

The biomechanical conditions at the knee and hip are influenced, among other factors, by bone anatomy, muscle morphology and function. Depending on the surgical approach, certain muscles may become less functional, and others have to compensate for this loss of function. The anatomy may have been slightly changed, e.g., by implant neck length and anteversion.

A meta study [44] found the following main differences during walking between healthy subjects and subjects with hip replacement: reductions in walking velocity, stride length, range of motion and peak hip abductor moment. Obviously, the reductions of the last three parameters at least partially depend on the lowered walking speed. For a static position, as during WBV, the changes due to joint replacement will be of lower importance. We therefore assume that the contact forces observed in our cohorts are similar to those in healthy subjects.

### Fluctuations of the static force

Frequent fluctuations of the static force  $F_{\text{stat}}$  throughout the vibration time can have two causes: Either the subjects slightly changed their position or they applied additional, antagonistic muscle forces without position changes. Based on the average relation between knee contact forces and the knee flexion angle during squat [11], a rise of  $F_{\text{dyn}}$  by 60%BW, as in Fig 4C, would be associated with a flexion increase by 23°. This change is much larger than the supervising physiotherapist would have overlooked. Such strong fluctuations are therefore probably caused by changing antagonistic muscle activities, but weight shifts between both legs cannot be excluded.

### Do increased EMG signals indicate a proportional rise of muscle forces?

At  $a_{\text{foot}} = 50 \text{ m/s}^2$ , the EMG signals in the lower limbs were reported to increase by 100% [17]. Our data, however, showed (Fig 8) that the dynamic knee contact forces  $F_{\text{dyn}}$  at the same acceleration (25 Hz, 4 mm) increased much less, namely, by only 22.6% (Galileo) or 15.2% (Powerplate) of  $F_{\text{stat}}$ . The biomechanical knee model (Fig 3) predicts that the muscle force rises by



nearly the same percentage. These data indicate that the muscle forces rise much less in response to WBV than do the EMG signals.

Under *isometric* conditions, the relations between muscle forces and EMG signals are nearly linear, at least for the sum of normalized EMG signals from all active muscles that act across a joint [45]. However, the same publication also shows that the maximum possible force of a muscle *strongly* decreases if its shortening velocity is high. We assume that the observed discrepancy between the estimated dynamic muscle force increases and the reported rises of EMG signals may be at least partially due to this phenomenon. Muscle contractions during whole body vibration exercises are obviously not isometric, even if the body position is kept unchanged.

When using inverse dynamics and optimization methods to *calculate* muscle and contact forces during *walking* [46], the obtained *time courses* of muscle forces and additionally measured EMG signals agreed well, and the relation between *absolute* muscle and contact forces was nearly proportional. Similarly, as predicted by our biomechanical model for the *stance*, the contact forces were always higher than the muscle forces. However, no model for the relation between EMG and muscle forces was used in our study. The discrepancy between our estimated muscle forces and the EMG signals, measured by others [17], let us conclude that the models used for estimating muscle forces from EMG signals during walking [47, 48] cannot be applied in WBV studies.

### Can the dynamic forces be responsible for the positive effects of WBV?

The contact forces during WBV were only 5.3% to 27.5% higher than the forces measured in the same body positions without vibrations. The biomechanical model predicts that the muscle forces are increased by nearly the same amount. The sum of static plus dynamic forces during WBV was always below 79%/56% (knee/hip) of the peak forces during walking, an activity which is typical for frequent everyday activities [10, 11]. Both contact and muscle forces are therefore much smaller during WBV than during normal life. As compiled in [S1 File](#), the outcome of WBV training is very controversial for all types of application to the lower limbs. The only small, vibration-induced force increases, reported here, indicate that the dynamic muscle forces *magnitudes* are probably not the cause of any positive muscle training effect of WBV.

*Other* effects may be decisive, for example simply the presence of vibrations independent of the dynamic force magnitudes, as shown in several studies: Bone reacted to *low-level* vibrations even in the absence of muscle activities [49, 50] or when the dynamic forces were much lower than the forces encountered during daily living [51, 52]. Identifying the complex reasons for positive, absent or negative influences of WBV on muscles and bone obviously requires innovative future hypotheses and investigations. Furthermore, the relation between the increases in muscle forces and EMG signals during WBV needs to be investigated in detail.

## Conclusions

- a. The influences of frequency, stroke, body position and platform type on the dynamic forces  $F_{\text{dyn}}$  in the knee and hip joints were often inconsistent. Increasing  $f$  or  $s$ , for example, sometimes nearly doubled  $F_{\text{dyn}}$  while leaving it unaffected in other cases. While increasing the knee flexion lowered  $F_{\text{dyn}}$  in knee and hip, the effect of standing in forefoot stance differed in knee and hip.
- b. The individual forces  $F_{\text{dyn}}$  differed appreciably under the same vibration conditions. Some subjects damped the vibration forces much better than others, perhaps because they were

more motivated to do so or had different muscle tonus. On the Powerplate,  $F_{\text{dyn}}$  was sometimes even close to zero.

- c. Vibrations increased joint contact forces *and* muscle forces much less than the EMG signals would suggest. Our data indicate that predicting muscle forces from EMG signals during WBV is questionable.
- d. Damping of the vibration forces between the foot and knee was much less than that between the knee and hip. Determinations of  $F_{\text{dyn}}$  from platform accelerations are unreliable.
- e. Only a small and varying percentage of the *hypothetical* acceleration force of the platform ( $F_{\text{foot}}$ ) really acted at the foot. This indicates the strong influence of damping in the body on the magnitude of  $F_{\text{dyn}}$ .
- f. The Galileo, with alternating movements, generally produced larger dynamic forces than the Powerplate, with its parallel movements.

All these uncertainties together may be the reason that the effects of vibration training in different application fields (e.g., muscle training, bone remodelling or osteoarthritis) are described very controversially in the literature.

## Supporting information

**S1 File. Survey of literature on whole body vibration training.**  
(DOCX)

## Acknowledgments

We thank the companies Novotec Medical and Stratec Medizintechnik and Powerplate GmbH for making the platforms available for this study.

## Author Contributions

**Conceptualization:** Georg Bergmann, Ines Kutzner, Alwina Bender, Philipp Damm.

**Data curation:** Jörn Dymke.

**Formal analysis:** Adam Trepczynski, Philipp Damm.

**Funding acquisition:** Georg Bergmann.

**Investigation:** Philipp Damm.

**Methodology:** Georg Bergmann, Jörn Dymke.

**Resources:** Dieter Felsenberg.

**Software:** Alwina Bender.

**Validation:** Ines Kutzner, Adam Trepczynski.

**Writing – original draft:** Georg Bergmann.

**Writing – review & editing:** Georg N. Duda, Dieter Felsenberg.

## References

1. Cardinale M, Bosco C. The use of vibration as an exercise intervention. *Exerc Sport Sci Rev.* 2003; 31(1):3–7. <https://doi.org/10.1097/00003677-200301000-00002> ISI:000180596000002. PMID: 12562163

2. Burke D, Schiller HH. Discharge pattern of single motor units in the tonic vibration reflex of human triceps surae. *Journal of Neurology, Neurosurgery and Psychiatry*. 1976;729–41. PMID: [956859](#)
3. Bazrgari B, Shirazi-Adl A, Kasra M. Seated whole body vibrations with high-magnitude accelerations—relative roles of inertia and muscle forces. *Journal of biomechanics*. 2008; 41(12):2639–46. Epub 2008/08/02. <https://doi.org/10.1016/j.jbiomech.2008.06.026> PMID: [18672242](#).
4. Pope ZK, DeFreitas JM. The effects of acute and prolonged muscle vibration on the function of the muscle spindle's reflex arc. *Somatosensory & motor research*. 2015; 32(4):254–61. Epub 2015/10/17. <https://doi.org/10.3109/08990220.2015.1091770> PMID: [26471430](#).
5. Cardinale M, Wakeling J. Whole body vibration exercise: are vibrations good for you? *British journal of sports medicine*. 2005; 39(9):585–9; discussion 9. Epub 2005/08/25. <https://doi.org/10.1136/bjsm.2005.016857> PMID: [16118292](#); PubMed Central PMCID: [PMC1725325](#).
6. Boyer KA, Nigg BM. Changes in muscle activity in response to different impact forces affect soft tissue compartment mechanical properties. *Journal of biomechanical engineering*. 2007; 129(4):594–602. Epub 2007/07/28. <https://doi.org/10.1115/1.2746384> PMID: [17655481](#).
7. Kersch-Schindl K, Grampp S, Henk C, Resch H, Preisinger E, Fialka-Moser V, et al. Whole-body vibration exercise leads to alterations in muscle blood volume. *Clinical Physiology*. 2001; 21(3):377–82. <https://doi.org/10.1046/j.1365-2281.2001.00335.x> ISI:000169085800014. PMID: [11380538](#)
8. Blottner D, Salanova M, Puttmann B, Schiffl G, Felsenberg D, Buehring B, et al. Human skeletal muscle structure and function preserved by vibration muscle exercise following 55 days of bed rest. *European journal of applied physiology*. 2006; 97(3):261–71. Epub 2006/03/29. <https://doi.org/10.1007/s00421-006-0160-6> PMID: [16568340](#).
9. Bosco C, Iacovelli M, Tsarpela O, Cardinale M, Bonifazi M, Tihanyi J, et al. Hormonal responses to whole-body vibration in men. *European journal of applied physiology*. 2000; 81:449–54 <https://doi.org/10.1007/s004210050067> PMID: [10774867](#)
10. Bergmann G, Bender A, Dymke J, Duda G, Damm P. Standardized loads acting in hip implants. *PloS one*. 2016; 11(5):e0155612. Epub 2016/05/20. <https://doi.org/10.1371/journal.pone.0155612> PMID: [27195789](#).
11. Bergmann G, Bender A, Graichen F, Dymke J, Rohlmann A, Trepczynski A, et al. Standardized loads acting in knee implants. *PloS one*. 2014; 9(1):e86035. Epub 2014/01/28. <https://doi.org/10.1371/journal.pone.0086035> PMID: [24465856](#); PubMed Central PMCID: [PMC3900456](#).
12. Gruber K, Ruder H, Denoth J, Schneider K. A comparative study of impact dynamics: wobbling mass model versus rigid body models. *Journal of biomechanics*. 1998; 31(5):439–44. Epub 1998/09/04. PMID: [9727341](#).
13. Tankisheva E, Jonkers I, Boonen S, Delecluse C, van Lenthe GH, Druyts HL, et al. Transmission of whole-body vibration and its effect on muscle activation. *Journal of strength and conditioning research / National Strength & Conditioning Association*. 2013; 27(9):2533–41. Epub 2012/12/12. <https://doi.org/10.1519/JSC.0b013e31827f1225> PMID: [23222086](#).
14. Sonza A, Volkel N, Zaro MA, Achaval M, Hennig EM. A whole body vibration perception map and associated acceleration loads at the lower leg, hip and head. *Medical engineering & physics*. 2015; 37(7):642–9. Epub 2015/05/13. <https://doi.org/10.1016/j.medengphy.2015.04.003> PMID: [25962379](#).
15. Rohlmann A, Hinz B, Bluthner R, Graichen F, Bergmann G. Loads on a spinal implant measured in vivo during whole-body vibration. *European spine journal: official publication of the European Spine Society, the European Spinal Deformity Society, and the European Section of the Cervical Spine Research Society*. 2010; 19(7):1129–35. Epub 2010/02/27. <https://doi.org/10.1007/s00586-010-1346-5> PMID: [20186440](#); PubMed Central PMCID: [PMC2900023](#).
16. Rohlmann A, Schmidt H, Gast U, Kutzner I, Damm P, Bergmann G. In vivo measurements of the effect of whole body vibration on spinal loads. *Eur Spine J*. 2014; 23(3):666–72. <https://doi.org/10.1007/s00586-013-3087-8> PMID: [24201510](#); PubMed Central PMCID: [PMCPMC3940795](#).
17. Lienhard K, Vienneau J, Nigg S, Friesenbichler B, Nigg BM. Older adults show higher increases in lower-limb muscle activity during whole-body vibration exercise. *Journal of biomechanics*. 2017; 52:55–60. <https://doi.org/10.1016/j.jbiomech.2016.12.009> WOS:000395217300009. PMID: [28017295](#)
18. Kotzar GM, Davy DT, Goldberg VM, Heiple KG, Berilla J, Heiple KG Jr., et al. Telemeterized in vivo hip joint force data: a report on two patients after total hip surgery. *J Orthop Res*. 1991; 9(5):621–33. Epub 1991/09/11. <https://doi.org/10.1002/jor.1100090502> PMID: [1870027](#).
19. Rydell NW. Forces acting in the femoral head-prosthesis. *Acta orthop scand*. 1966; 88 (Suppl.):37ff.
20. Bergmann G, Graichen F, Rohlmann A. Hip joint loading during walking and running, measured in two patients. *Journal of biomechanics*. 1993; 26(8):969–90. Epub 1993/08/01. PMID: [8349721](#).

21. Bergmann G, Graichen F, Rohlmann A, Bender A, Heinlein B, Duda GN, et al. Realistic loads for testing hip implants. *Bio-medical materials and engineering*. 2010; 20(2):65–75. Epub 2010/07/02. <https://doi.org/10.3233/BME-2010-0616> PMID: 20592444.
22. Bergmann G, Graichen F, Rohlmann A, Westerhoff P, Bender A, Gabel U, et al. [Loads acting on orthopaedic implants. Measurements and practical applications]. *Der Orthopade*. 2007; 36(3):195–6, 8–200, 2–4. Epub 2007/03/03. <https://doi.org/10.1007/s00132-007-1055-x> PMID: 17333070.
23. Damm P, Bender A, Bergmann G. Postoperative changes in in vivo measured friction in total hip joint prosthesis during walking. *PloS one*. 2015; 10(3):e0120438. Epub 2015/03/26. <https://doi.org/10.1371/journal.pone.0120438> PMID: 25806805; PubMed Central PMCID: PMC4373913.
24. Damm P, Dymke J, Ackermann R, Bender A, Graichen F, Halder A, et al. Friction in total hip joint prosthesis measured in vivo during walking. *PloS one*. 2013; 8(11):e78373. Epub 2013/11/22. <https://doi.org/10.1371/journal.pone.0078373> PMID: 24260114; PubMed Central PMCID: PMC3832636.
25. Damm P, Graichen F, Rohlmann A, Bender A, Bergmann G. Total hip joint prosthesis for in vivo measurement of forces and moments. *Medical engineering & physics*. 2010; 32(1):95–100. Epub 2009/11/06. <https://doi.org/10.1016/j.medengphy.2009.10.003> PMID: 19889565.
26. Damm P, Schwachmeyer V, Dymke J, Bender A, Bergmann G. In vivo hip joint loads during three methods of walking with forearm crutches. *Clin Biomech (Bristol, Avon)*. 2013; 28(5):530–5. Epub 2013/05/07. <https://doi.org/10.1016/j.clinbiomech.2012.12.003> PMID: 23643290.
27. Kaufman KR, Kovacevic N, Irby SE, Colwell CW. Instrumented implant for measuring tibiofemoral forces. *Journal of biomechanics*. 1996; 29(5):667–71. [https://doi.org/10.1016/0021-9290\(95\)00124-7](https://doi.org/10.1016/0021-9290(95)00124-7) ISI:A1996UC07800014. PMID: 8707796
28. D'Lima DD, Steklov N, Patil S, Colwell CW Jr. The Mark Coventry Award: in vivo knee forces during recreation and exercise after knee arthroplasty. *Clinical orthopaedics and related research*. 2008; 466(11):2605–11. Epub 2008/06/20. <https://doi.org/10.1007/s11999-008-0345-x> PMID: 18563502; PubMed Central PMCID: PMC2565055.
29. Halder A, Kutzner I, Graichen F, Heinlein B, Beier A, Bergmann G. Influence of limb alignment on mediolateral loading in total knee replacement: in vivo measurements in five patients. *The Journal of bone and joint surgery American volume*. 2012; 94(11):1023–9. Epub 2012/05/29. <https://doi.org/10.2106/JBJS.K.00927> PMID: 22637208.
30. Heinlein B, Kutzner I, Graichen F, Bender A, Rohlmann A, Halder AM, et al. ESB Clinical Biomechanics Award 2008: Complete data of total knee replacement loading for level walking and stair climbing measured in vivo with a follow-up of 6–10 months. *Clin Biomech (Bristol, Avon)*. 2009; 24(4):315–26. Epub 2009/03/17. <https://doi.org/10.1016/j.clinbiomech.2009.01.011> PMID: 19285767.
31. Heller MO, Trepczynski A, Kutzner I, Taylor WR, Bergmann G. Insight from Direct in Vivo Measurements on the Force Distribution across the Human Knee in Flexion: Can It Be Modified, and Can the Internal Loads Be Predicted from External Measurements? *Osteoarthr Cartilage*. 2014; 22:S100–S. <https://doi.org/10.1016/j.joca.2014.02.190> WOS:000335424800175.
32. Kutzner I, Bender A, Dymke J, Duda G, von Roth P, Bergmann G. Mediolateral force distribution at the knee joint shifts across activities and is driven by tibiofemoral alignment. *Bone Joint J*. 2017; 99b(6):779–87. <https://doi.org/10.1302/0301-620x.99b6.Bjj-20160713.R1> WOS:000402402100011.
33. Kutzner I, Damm P, Heinlein B, Dymke J, Graichen F, Bergmann G. The effect of laterally wedged shoes on the loading of the medial knee compartment-in vivo measurements with instrumented knee implants. *J Orthop Res*. 2011; 29(12):1910–5. Epub 2011/06/10. <https://doi.org/10.1002/jor.21477> PMID: 21656850.
34. Kutzner I, Heinlein B, Graichen F, Bender A, Rohlmann A, Halder A, et al. Loading of the knee joint during activities of daily living measured in vivo in five subjects. *Journal of biomechanics*. 2010; 43(11):2164–73. Epub 2010/06/12. <https://doi.org/10.1016/j.jbiomech.2010.03.046> PMID: 20537336.
35. Kutzner I, Heinlein B, Graichen F, Rohlmann A, Halder AM, Beier A, et al. Loading of the knee joint during ergometer cycling: telemetric in vivo data. *The Journal of orthopaedic and sports physical therapy*. 2012; 42(12):1032–8. Epub 2013/01/25. <https://doi.org/10.2519/jospt.2012.4001> PMID: 23346556.
36. Kutzner I, Kuther S, Heinlein B, Dymke J, Bender A, Halder AM, et al. The effect of valgus braces on medial compartment load of the knee joint - in vivo load measurements in three subjects. *Journal of biomechanics*. 2011; 44(7):1354–60. Epub 2011/02/04. <https://doi.org/10.1016/j.jbiomech.2011.01.014> PMID: 21288522.
37. Kutzner I, Richter A, Gordt K, Dymke J, Damm P, Duda GN, et al. Does aquatic exercise reduce hip and knee joint loading? In vivo load measurements with instrumented implants. *PloS one*. 2017; 12(3). ARTN e0171972 10.1371/journal.pone.0171972. WOS:000398945800002.
38. Kutzner I, Stephan D, Dymke J, Bender A, Graichen F, Bergmann G. The influence of footwear on knee joint loading during walking - in vivo load measurements with instrumented knee implants. *Journal of*

- biomechanics. 2013; 46(4):796–800. <https://doi.org/10.1016/j.jbiomech.2012.11.020> WOS:000315973700024. PMID: 23219275
39. Kutzner I, Trepczynski A, Heller MO, Bergmann G. Knee Adduction Moment and Medial Contact Force - Facts about Their Correlation during Gait. *PloS one*. 2013; 8(12). ARTN e81036 10.1371/journal.pone.0081036. WOS:000327944500054.
  40. OrthoLoad\_Database. Loading of orthoaeedic implants 2016 [cited 2016 may 2]. Available from: [www.OrthoLoad.com](http://www.OrthoLoad.com).
  41. Graichen F, Arnold R, Rohlmann A, Bergmann G. Implantable 9-channel telemetry system for in vivo load measurements with orthopedic implants. *IEEE transactions on bio-medical engineering*. 2007; 54(2):253–61. Epub 2007/02/07. <https://doi.org/10.1109/TBME.2006.886857> PMID: 17278582.
  42. Heinlein B, Graichen F, Bender A, Rohlmann A, Bergmann G. Design, calibration and pre-clinical testing of an instrumented tibial tray. *Journal of biomechanics*. 2007; 40 Suppl 1:S4–10. Epub 2007/04/17. <https://doi.org/10.1016/j.jbiomech.2007.02.014> PMID: 17433815.
  43. Bender A, Bergmann G. Determination of typical patterns from strongly varying signals. *Computer methods in biomechanics and biomedical engineering*. 2012; 15(7):761–9. Epub 2011/07/05. <https://doi.org/10.1080/10255842.2011.560841> PMID: 21722048.
  44. Ewen AM, Stewart S, Gibson ASC, Kashyap SN, Caplan N. Post-operative gait analysis in total hip replacement patients—a review of current literature and meta-analysis. *Gait & posture*. 2012; 36(1):1–6.
  45. Hof AL. The relationship between elektromyogram and muscle force. *Sportverl und Sportschad*. 1979; 11:79–86.
  46. Richards C, Higginson J. Knee contact force in subjects with symmetrical OA grades: differences between OA severities. *Journal of biomechanics*. 2010; 43(13):2595–600. <https://doi.org/10.1016/j.jbiomech.2010.05.006> PMID: 20627301
  47. Gerus P, Sartori M, Besier TF, Fregly BJ, Delp SL, Banks SA, et al. Subject-specific knee joint geometry improves predictions of medial tibiofemoral contact forces. *Journal of biomechanics*. 2013; 46(16):2778–86. Epub 2013/10/01. <https://doi.org/10.1016/j.jbiomech.2013.09.005> PMID: 24074941; PubMed Central PMCID: PMC3888900.
  48. Modenese L, Phillips AT. Prediction of hip contact forces and muscle activations during walking at different speeds. *Multibody System Dynamics*. 2012; 28(1-2):157–68.
  49. Judex S, Rubin C. Is bone formation induced by high-frequency mechanical signals modulated by muscle activity? *Journal of musculoskeletal & neuronal interactions*. 2010; 10(1):3.
  50. Ozcivici E, Garman R, Judex S. High-frequency oscillatory motions enhance the simulated mechanical properties of non-weight bearing trabecular bone. *Journal of biomechanics*. 2007; 40(15):3404–11. <https://doi.org/10.1016/j.jbiomech.2007.05.015> PMID: 17655852
  51. Gilsanz V, Wren TA, Sanchez M, Dorey F, Judex S, Rubin C. Low-level, high-frequency mechanical signals enhance musculoskeletal development of young women with low BMD. *Journal of Bone and Mineral Research*. 2006; 21(9):1464–74. <https://doi.org/10.1359/jbmr.060612> PMID: 16939405
  52. Rubin C, Recker R, Cullen D, Ryaby J, McCabe J, McLeod K. Prevention of postmenopausal bone loss by a low-magnitude, high-frequency mechanical stimuli: a clinical trial assessing compliance, efficacy, and safety. *Journal of Bone and Mineral Research*. 2004; 19(3):343–51 <https://doi.org/10.1359/JBMR.0301251> PMID: 15040821
